# Supplementary material
Source: Elsevier journal article supplement (https://www.sciencedirect.com/science/article/pii/S0213005X15001512)
Supplement: mmc1 [file S0213005X15001512:mmc1.docx]

**Supplementary Table 1.** Comparison of characteristics of adult patients admitted to ICU with influenza A infection by subtype A(H1N1) pdm09 and non-pandemic influenza infection in Hospital Universitari Vall d´Hebron, Barcelona, Spain.

|  | A(H1N1)pdm09*  (n=35) | 2011/14  (n=36) | Post-pandemic influenza A infection | | | |
| --- | --- | --- | --- | --- | --- | --- |
|  | 2011/12  (n=8) | 2012/13  (n=4) | 2013/14  (n=24) |  |
| Gender, male, n (%) | 18 (51.4) | 19 (52.8) | 3 (37.5) | 3 (75) | 13(54.2) |  |
| Age, years, median (IQR) | 43 (33-53) | 52 (37-63) | 50(35-77) | 57(40-62) | 51(36-62) |  |
| APACHE II, median (IQR) | 13 (9-24) | 17 (12-23) | 18(16-24) | 15(13-18) | 15(9-23) |  |
| SOFA, median (IQR) | 4 (3-6) | 6 (4-8) | 6(4-8) | 6(4-8) | 6(3-10) |  |
| Comorbidities, n (%) | 25 (71.4) | 23 (65.7) | 4(50) | 3(75) | 16(66.7) |  |
| Obesity (BMI>30) | 8 (22.9) | 8 (28.8) | 0 | 1(25) | 7(29.2) |  |
| Pregnancy | 3 (8.6) | 4 (11.1) | 0 | 1(25) | 3(12.5) |  |
| Asthma | 7 (20) | 5 (13.9) | 3(20) | 1(12.5) | 4(16.7) |  |
| COPD | 6 (17.1) | 10 (27.8) | 2(25) | 2(50) | 6(25) |  |
| ILI, n (%) | 30 (85.7) | 27 (75) | 5 (62.5) | 2 (50) | 20 (83.3) |  |
| Days symptoms-to-ICU, median(IQR) | 5 (3-7) | 4 (2-6) | 4(2 -5) | 4(1-13) | 4(2-6) |  |
| CxR > 2 QO, n (%) | 20 (57.1) | 22 (61.1) | 5(62.5) | 2(50) | 5(20.8) |  |
| Primary viral pneumonia, n (%) | 20 (57.1) | 21 (58.3) | 6(75) | 1(25) | 14(58.3) |  |
| Bacterial co-infection, n(%) | 7 (20) | 11 (27.8) | 0 | 2(50) | 9(37.5) |  |
| Secondary bacterial pneumonia, n (%) | 8 (22.8) | 3 (11.1) | 1(13) | 0 | 2(8.3) |  |
| Shock, n (%) | 15 (42.9) | 17 (46.2) | 2(25) | 3(75) | 12(50) |  |
| HFNC, n (%) | 20 (57.1) | 25 (69.4) | 4(50) | 4(100) | 17(70.8) |  |
| Mechanical Ventilation, n (%) | 21 (60) | 18 (50) | 4(50) | 3(75) | 11(45.8) |  |
| MV days, median (IQR) | 13 (8-38) | 7 (4-17) | 5(3-16) | 9(4-14) | 7(4-33) |  |
| ICU days, median (IQR) | 10 (3-30) | 7 (4-14) | 6(4-10) | 11(6-28) | 6(4-14) |  |
| Mortality, n (%) | 5 (14.3) | 5 (14.4) | 1(12.5) | 3(75) | 1(4.2) |  |
